# Supplementary material
Source: publisher figshare collection journal article supplement (https://frontiersin.figshare.com/ndownloader/files/14868341)
Supplement: Supplementary file [file 14868341]

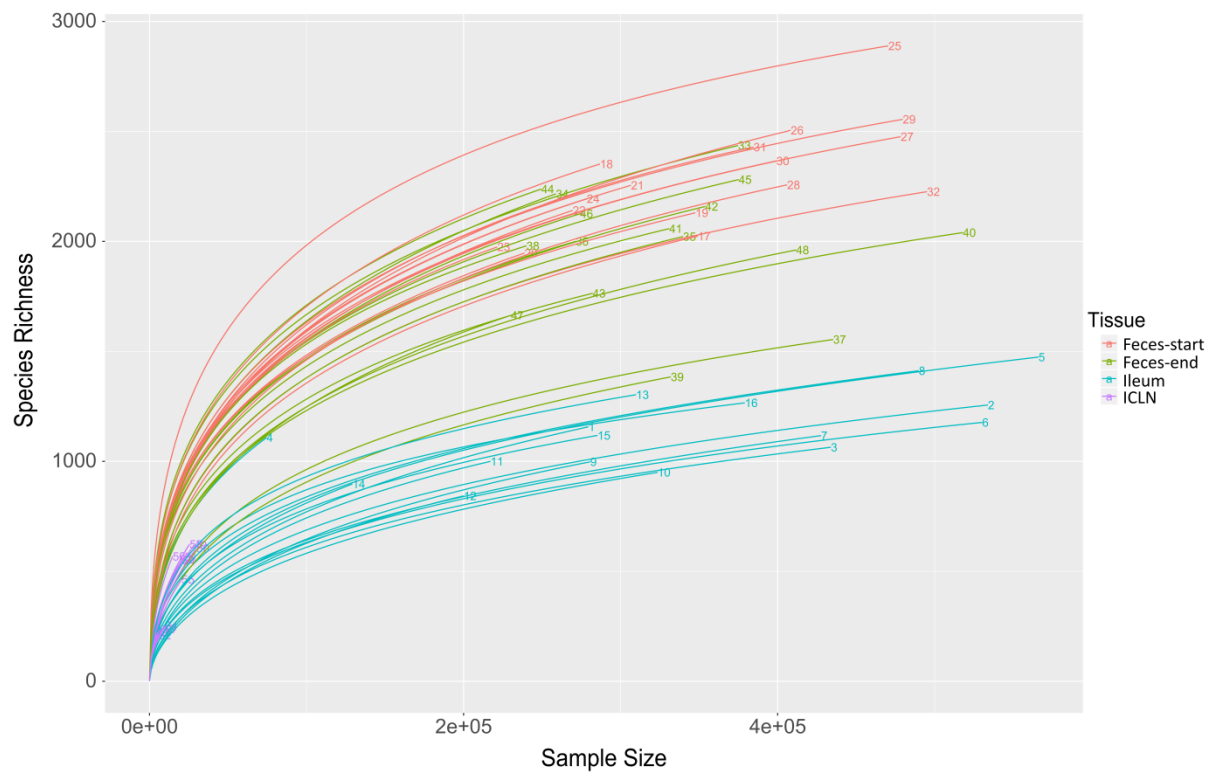

Supplementary Figure S1: Rarefaction curve of individual 16S rRNA gene libraries.
